# Supplementary material for: Rheological and Printability Assessments on Biomaterial Inks of Nanocellulose/Photo-Crosslinkable Biopolymer in Light-Aided 3D Printing
Source: Frontiers journal article supplement (doi:10.3389/fceng.2021.723429), 2021-09-21
Supplement: Data_Sheet_1.pdf [file Data_Sheet_1.pdf]

# Rheological and Printability Assessments on Biomaterial Inks of Nanocellulose/Photo-crosslinkable Biopolymer in Light-aided 3D Printing

Qingbo Wang<sup>1</sup>, Oskar Backman<sup>1</sup>, Markus Nuopponen<sup>2</sup>, Chunlin Xu<sup>1</sup>, Xiaoju Wang<sup>1,3\*</sup>

<sup>1</sup>Laboratory of Natural Materials Technology, Faculty of Science and Engineering, Åbo Akademi University, Turku, Finland

<sup>2</sup>UPM-Kymmene Corporation, Biomedicals, Tukholmankatu 8, Helsinki FI-00290, Finland

<sup>3</sup>Pharmaceutical Sciences Laboratory, Faculty of Science and Engineering, Åbo Akademi University, Turku, Finland

**\* Correspondence:**

Xiaoju Wang

[xiaoju.wang@abo.fi](mailto:xiaoju.wang@abo.fi)

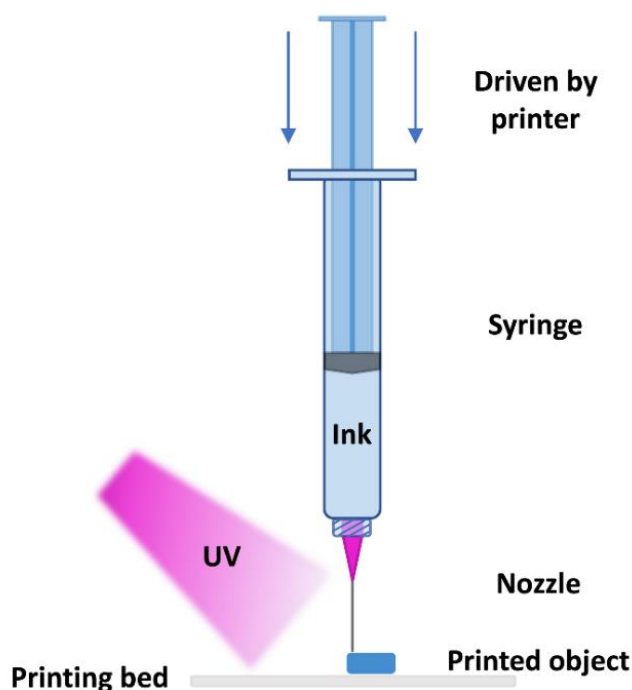

**Figure S1.** Schematic demonstration of 3D bioprinter and the hydrogel extrusion-based printing process. Photo-cross-linkable bioink was loaded into a syringe and extruded by the compress of the plunger, which is driven by the printer. During the extrusion, the syringe and nozzle were moving in x-y planed at a given path. The photo-crosslinkable bioink was further *in situ* crosslinked by UV after extrusion to strengthen the shape fidelity.

**Table S1.** Ink formulations in this work

| Ink                                  | GrowInk-N<br>(wt%) | GrowInk-T<br>(wt%) | GGMMA<br>(wt%) | GelMA<br>(wt%) | LAP<br>(wt%) | Diluted with<br>PBS/water |
|--------------------------------------|--------------------|--------------------|----------------|----------------|--------------|---------------------------|
| 1/1.5/2% GrowInk-N-water             | 1/1.5/2            | -                  | -              | -              | -            | water                     |
| 1/1.5/2% GrowInk-N-PBS               | 1/1.5/2            | -                  | -              | -              | -            | PBS                       |
| 1/1.5/2% GrowInk-N+2%<br>GGMMA-water | 1/1.5/2            | -                  | 2              | -              | 0.1          | water                     |
| 1/1.5/2% GrowInk-N+2%<br>GGMMA-PBS   | 1/1.5/2            | -                  | 2              | -              | 0.1          | PBS                       |
| 1/1.5/2% GrowInk-N+5%<br>GelMA-water | 1/1.5/2            | -                  | -              | 5              | 0.1          | water                     |
| 1/1.5/2% GrowInk-N+5%<br>GelMA-PBS   | 1/1.5/2            | -                  | -              | 5              | 0.1          | PBS                       |
| 1/1.5% GrowInk-T-water               | -                  | 1/1.5              | -              | -              | -            | water                     |
| 1/1.5% GrowInk-T-PBS                 | -                  | 1/1.5              | -              | -              | -            | PBS                       |
| 1/1.5% GrowInk-T+2%<br>GGMMA-water   | -                  | 1/1.5              | 2              | -              | 0.1          | water                     |
| 1/1.5% GrowInk-T+2%<br>GGMMA-PBS     | -                  | 1/1.5              | 2              | -              | 0.1          | PBS                       |
| 1/1.5% GrowInk-T+5%<br>GelMA-water   | -                  | 1/1.5              | -              | 5              | 0.1          | water                     |
| 1/1.5% GrowInk-T+5%<br>GelMA-PBS     | -                  | 1/1.5              | -              | 5              | 0.1          | PBS                       |

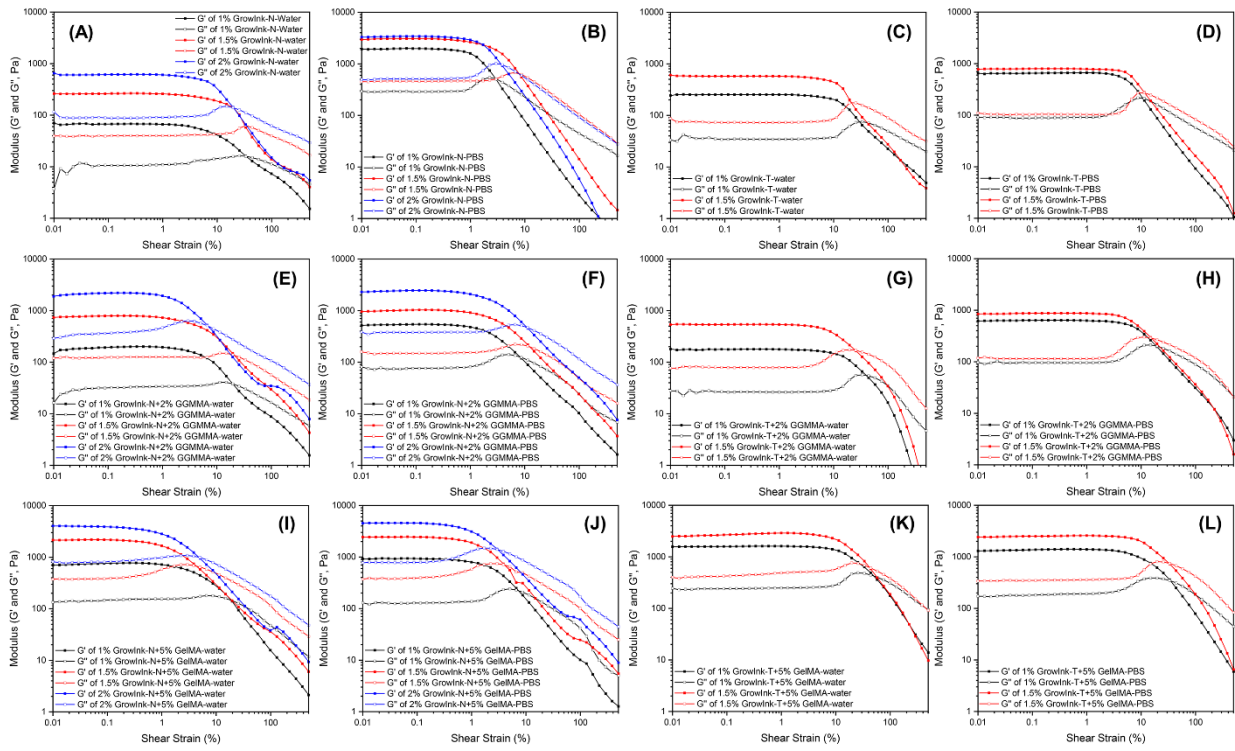

**Figure S2.** Amplitude sweep of the formulated inks plotted against the shear strain. (A-D: GrowInk-N and GrowInk-T, E-H: GGMA incorporated GrowInk-N and GrowInk-T-based inks, and I-L: GelMA incorporated GrowInk-N and GrowInk-T-based inks diluted with PBS buffer and water, respectively. Closed symbol:  $G'$ , open symbol:  $G''$ )

**Table S2.** Time required for G' of the inks to exceed 2.15 kPa after UV irradiation.

| Ink                           | Time (s) | G' (kPa) |
|-------------------------------|----------|----------|
| 1% GrowInk-N+2% GGMMA-PBS     | 1.5      | 2.10     |
| 1.5% GrowInk-N+2% GGMMA-PBS   | 1.5      | 2.60     |
| 2% GrowInk-N+2% GGMMA-PBS     | 0        | -        |
| 1% GrowInk-N+2% GGMMA-water   | 7        | 2.29     |
| 1.5% GrowInk-N+2% GGMMA-water | 2        | 2.65     |
| 2% GrowInk-N+2% GGMMA-water   | 1        | 2.21     |
| 1% GrowInk-N+5% GelMA-PBS     | 2        | 2.31     |
| 1.5% GrowInk-N+5% GelMA-PBS   | 1.5      | 2.62     |
| 2% GrowInk-N+5% GelMA-PBS     | 0        | -        |
| 1% GrowInk-N+5% GelMA-water   | 8        | 2.19     |
| 1.5% GrowInk-N+5% GelMA-water | 1.5      | 2.54     |
| 2% GrowInk-N+5% GelMA-water   | 0        | -        |
| 1% GrowInk-T+2% GGMMA-PBS     | 3        | 2.50     |
| 1.5% GrowInk-T+2% GGMMA-PBS   | 2        | 2.93     |
| 1% GrowInk-T+2% GGMMA-water   | 4.5      | 3.46     |
| 1.5% GrowInk-T+2% GGMMA-water | 3        | 3.29     |
| 1% GrowInk-T+5% GelMA-PBS     | 15       | 2.16     |
| 1.5% GrowInk-T+5% GelMA-PBS   | 1.5      | 2.47     |
| 1% GrowInk-T+5% GelMA-water   | 2        | 2.88     |
| 1.5% GrowInk-T+5% GelMA-water | 1        | 2.42     |

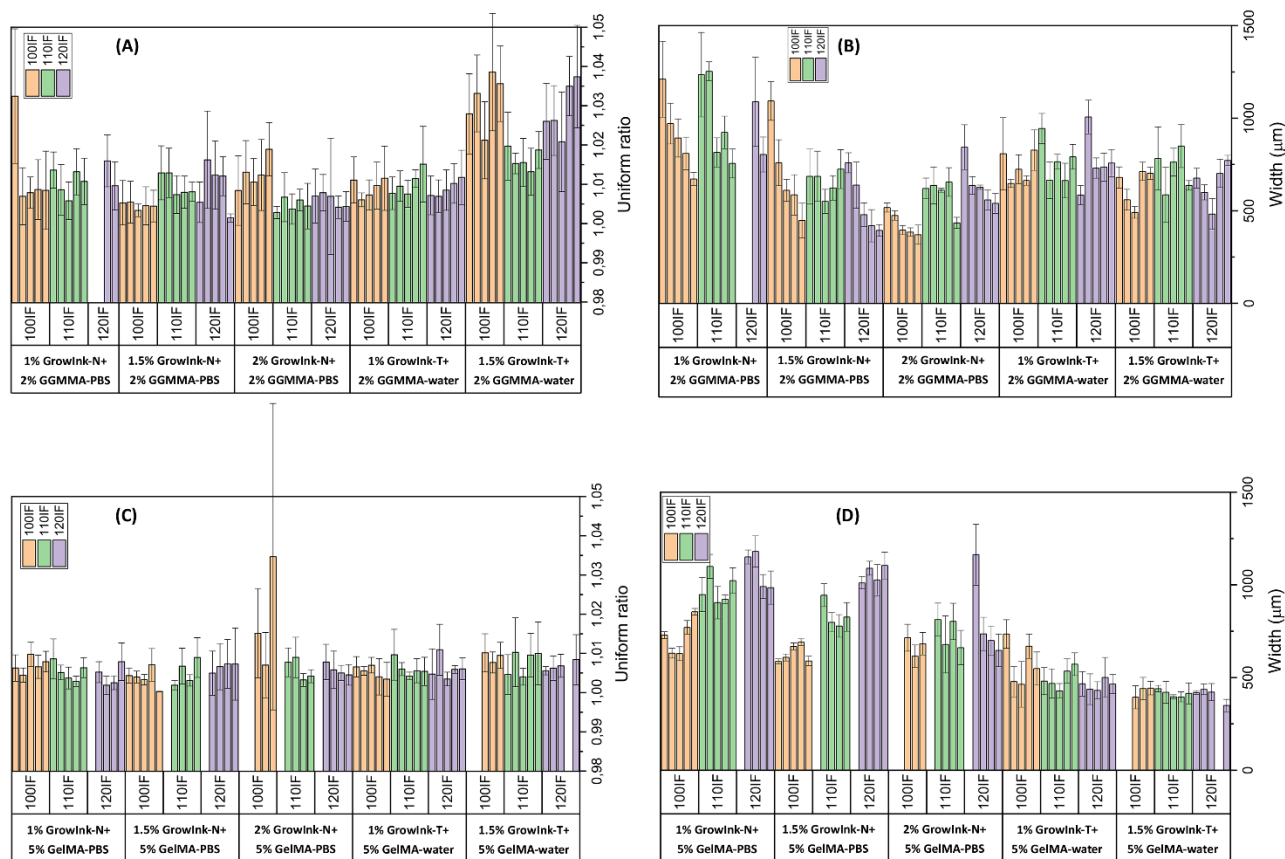

**Figure S3.** Uniformity ratio and width of (A and B) GrowInk-GGMMA and (C and D) GrowInk-GelMA-based inks. (5 columns under the same input flow rate and from left to right corresponding to the printing speed of 4, 8, 12, 16, and 20 mm/s. The non-extrudable filaments were not listed in the figure)
